# Supplementary material for: Effect of intracoronary agents on the no-reflow phenomenon during primary percutaneous coronary intervention in patients with ST-elevation myocardial infarction: a network meta-analysis
Source: PubMed Central journal article supplement (PMC5763527; doi:10.1186/s12872-017-0722-z), 2018-01-10
Supplement: 12872_2017_722_MOESM1_ESM.pdf [file 12872_2017_722_MOESM1_ESM.pdf]

**Table S1.** Subgroup analysis for select outcomes based on the type of control group across trials.

| Comparators                | References    | Outcomes (network odds ratio with 95% CI) |                  |                        |                   |
|----------------------------|---------------|-------------------------------------------|------------------|------------------------|-------------------|
|                            |               | TFG < 3                                   | STR              | LVEF <sup>#</sup>      | MACEs             |
| Placebo                    |               |                                           |                  |                        |                   |
|                            | Anisodamine   | 3.66 (0.97-13.67)                         | 0.35 (0.10-1.28) | -4.85 (-12.21 to 2.53) | 4.96 (1.26-21.15) |
|                            | Nitroprusside | 1.48 (0.77-3.02)                          | 0.69 (0.36-1.19) | -5.25 (-10.89 to 0.47) | 1.65 (0.92-3.05)  |
|                            | Adenosine     | 1.70 (1.15-2.68)                          | 0.54 (0.35-0.76) | -0.91 (-3.71 to 1.98)  | 1.59 (1.15-2.24)  |
|                            | Diltiazem     | 0.86 (0.11-5.96)                          | 1.20 (0.19-7.38) | 3.09 (-7.87 to 14.26)  | 1.63 (0.22-11.41) |
|                            | Verapamil     | 6.20 (1.99-23.21)                         | 0.69 (0.23-1.82) | -3.15 (-7.61 to 1.56)  | 1.31 (0.58-3.00)  |
|                            | Nicorandil    | -                                         | -                | -                      | -                 |
|                            | Urapidil      | 0.30 (0.00-20.00)                         | 0.39 (0.07-2.06) | -3.84 (-9.06 to 1.42)  | 0.97 (0.02-35.26) |
| Conventional<br>PPCI alone |               |                                           |                  |                        |                   |
|                            | Anisodamine   | 4.31 (1.31-13.88)                         | 0.27 (0.08-0.99) | -6.00 (-8.48 to -3.90) | 8.52 (2.38-34.98) |
|                            | Nitroprusside | 2.27 (1.18-4.31)                          | 0.82 (0.23-2.33) | 0.47 (-2.93 to 2.61)   | 1.23 (0.37-3.56)  |
|                            | Adenosine     | 1.92 (0.59-6.29)                          | 0.86 (0.29-2.53) | 1.50 (-1.26 to 3.67)   | 0.19 (0.02-1.67)  |
|                            | Diltiazem     | 1.98 (0.66-5.75)                          | 0.67 (0.19-2.26) | -0.22 (-3.49 to 2.96)  | 2.64 (0.66-11.53) |
|                            | Verapamil     | 3.00 (1.24-7.17)                          | 0.75 (0.23-2.54) | -1.25 (-3.82 to 1.10)  | 1.71 (0.40-7.65)  |
|                            | Nicorandil    | 3.34 (1.50-7.96)                          | 0.28 (0.08-0.97) | 0.88 (-1.83 to 2.79)   | 1.50 (0.62-4.14)  |
|                            | Urapidil      | -                                         | -                | -                      | -                 |

TFG, TIMI flow grade; STR, ST-segment resolution; LVEF, left ventricular ejection fraction; MACEs, major adverse cardiovascular events; PPCI, primary percutaneous coronary intervention. <sup>#</sup> Values are expressed as mean difference with 95% CI.

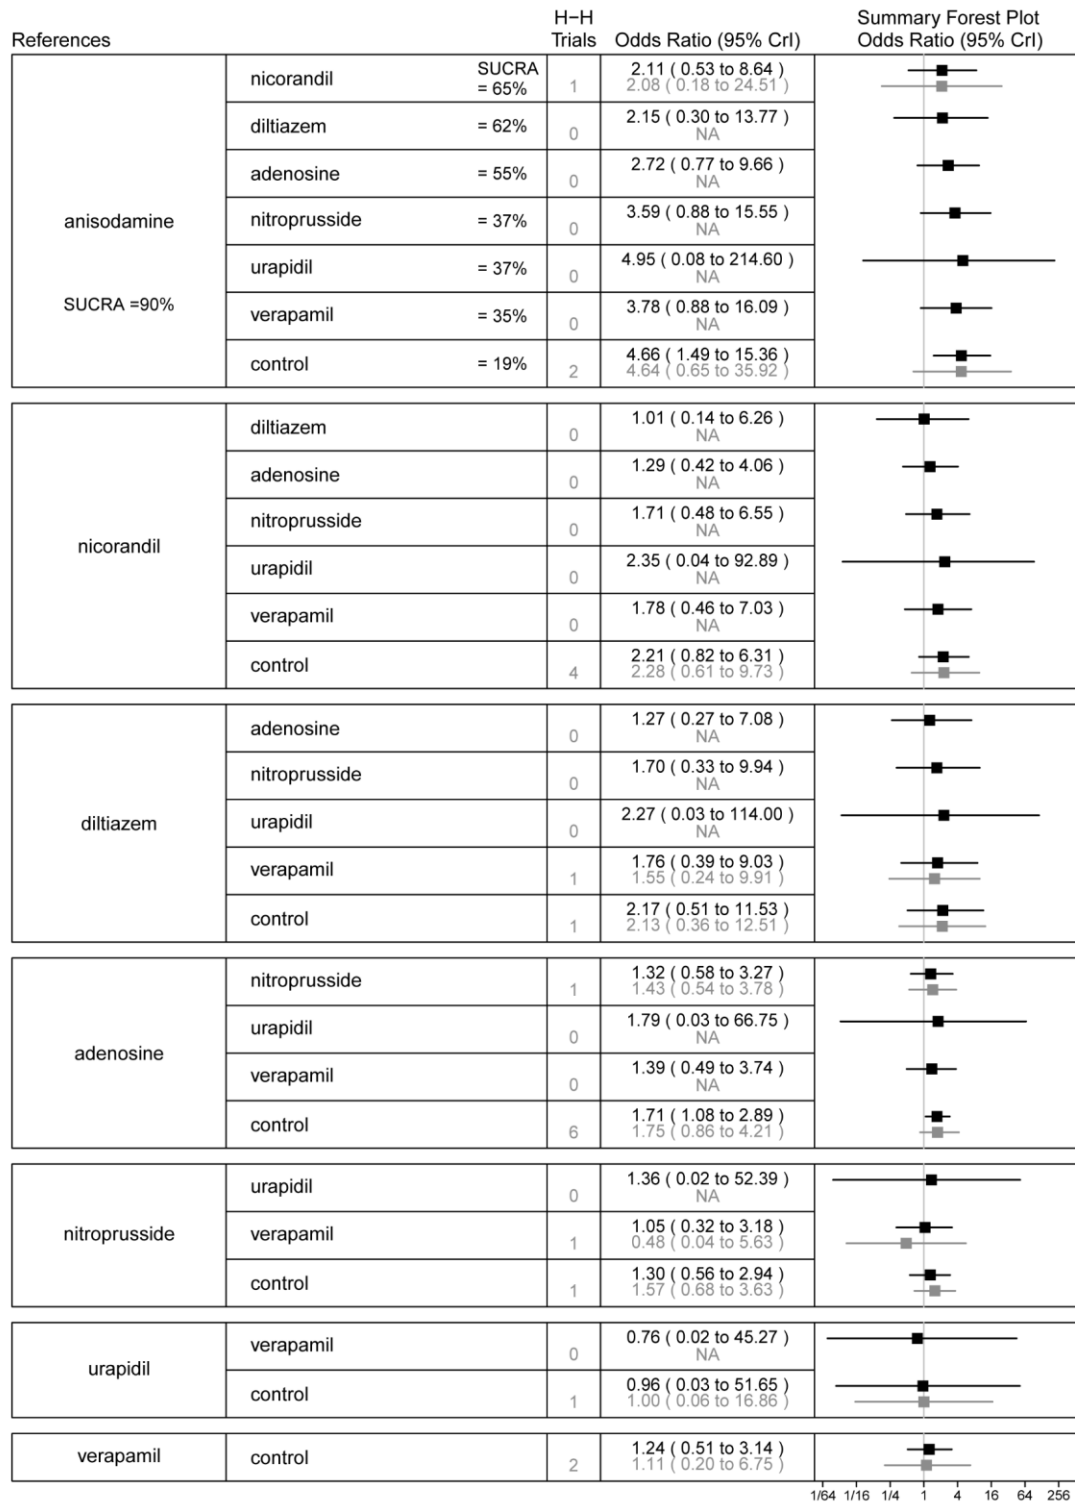

**Fig. S1** Summary forest plot table for the outcome of major adverse cardiovascular events during short-term follow-up ( $\leq 4.5$  months). H-H trials, head-to-head trials; black text, network meta-analysis results; grey text, pairwise meta-analysis results; CrI, credible interval; SUCRA, the surface under the cumulative ranking curve; Interventions are displayed by SUCRA percentages; Each intervention in the second column was compared with the intervention listed in the first column.

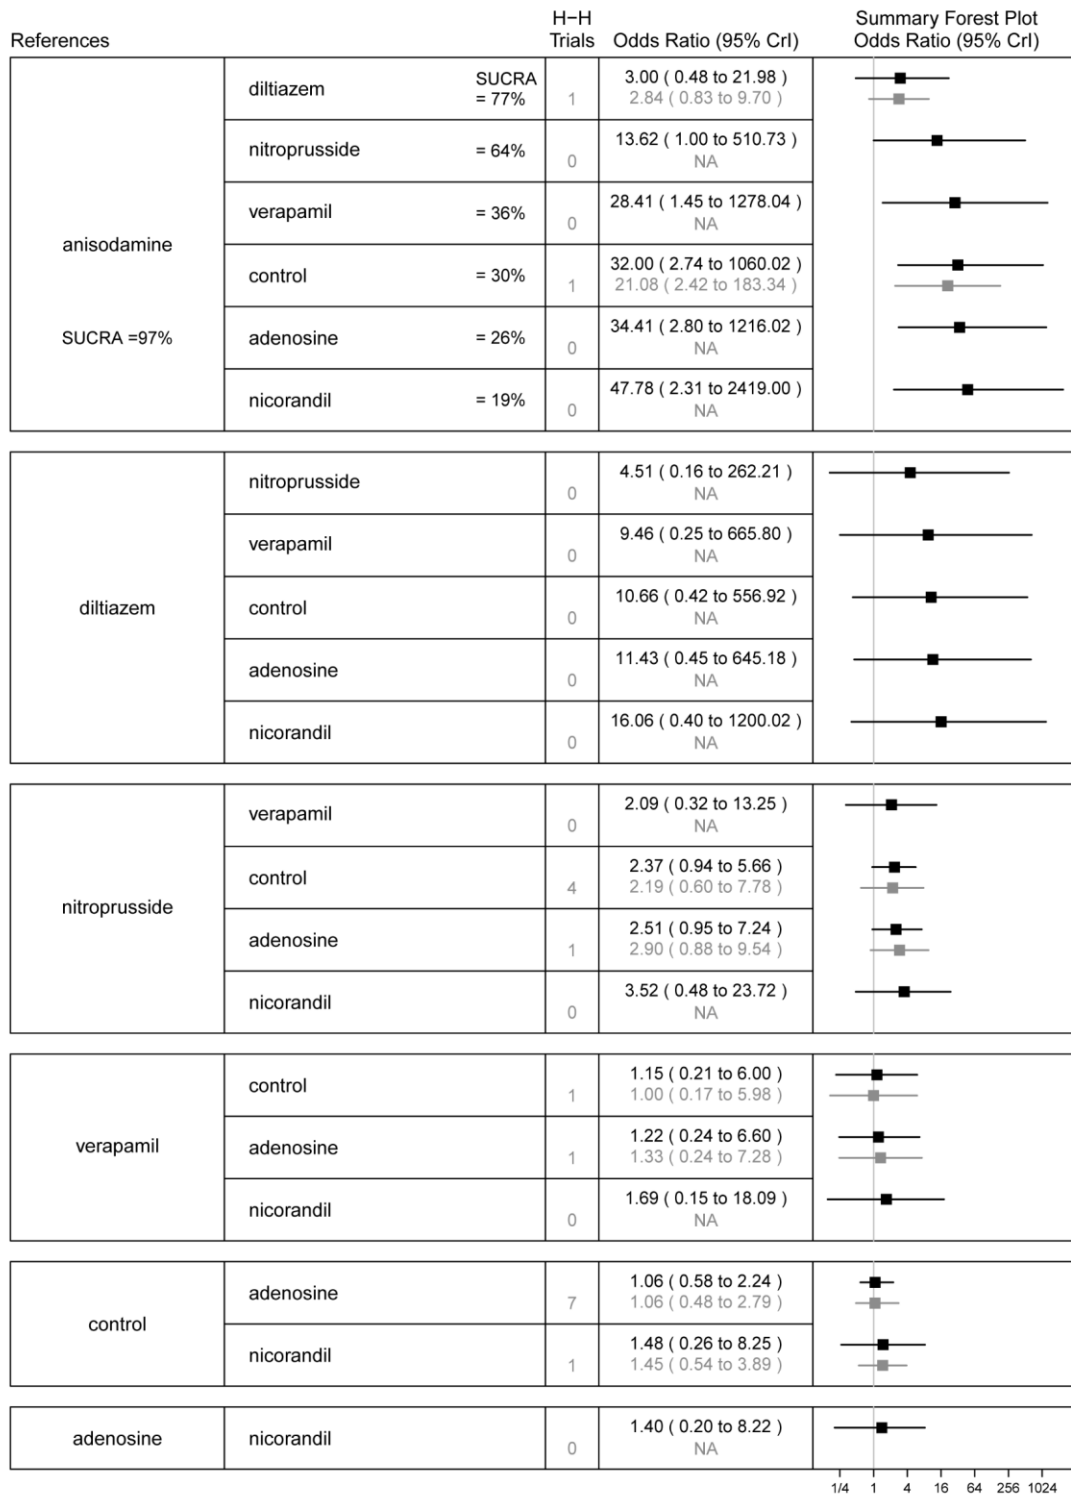

**Fig. S2** Summary forest plot table for the outcome of major adverse cardiovascular events during long-term follow-up (>4.5 months). H-H trials, head-to-head trials; black text, network meta-analysis results; grey text, pairwise meta-analysis results; CrI, credible interval; SUCRA, the surface under the cumulative ranking curve; Interventions are displayed by SUCRA percentages; Each intervention in the second column was compared with the intervention listed in the first column.

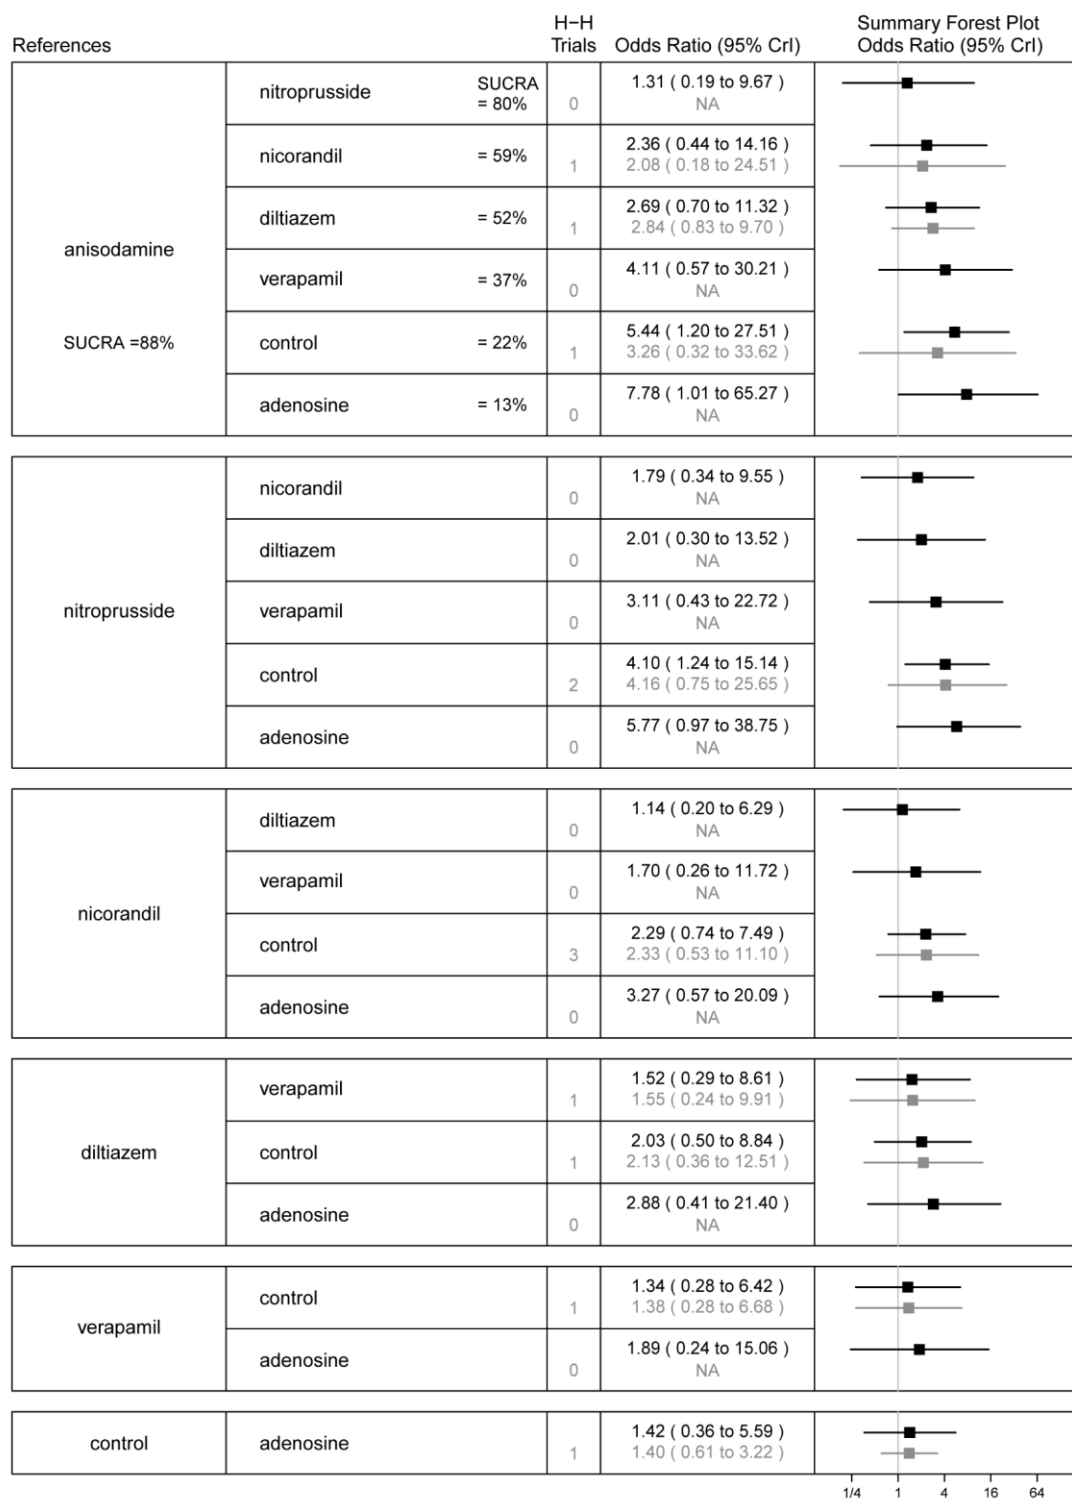

**Fig. S3** Summary forest plot table for the outcome of major adverse cardiovascular events defined as a composite of death, reinfarction, or revascularization. H-H trials, head-to-head trials; black text, network meta-analysis results; grey text, pairwise meta-analysis results; CrI, credible interval; SUCRA, the surface under the cumulative ranking curve; Interventions are displayed by SUCRA percentages; Each intervention in the second column was compared with the intervention listed in the first column.
